# Supplementary material
Source: PubMed Central journal article supplement (PMC3890874)
Supplement: 1321341111_pnas.201321341SI.pdf [file 1321341111_pnas.201321341SI.pdf]

# Supporting Information

Yang et al. 10.1073/pnas.1321341111

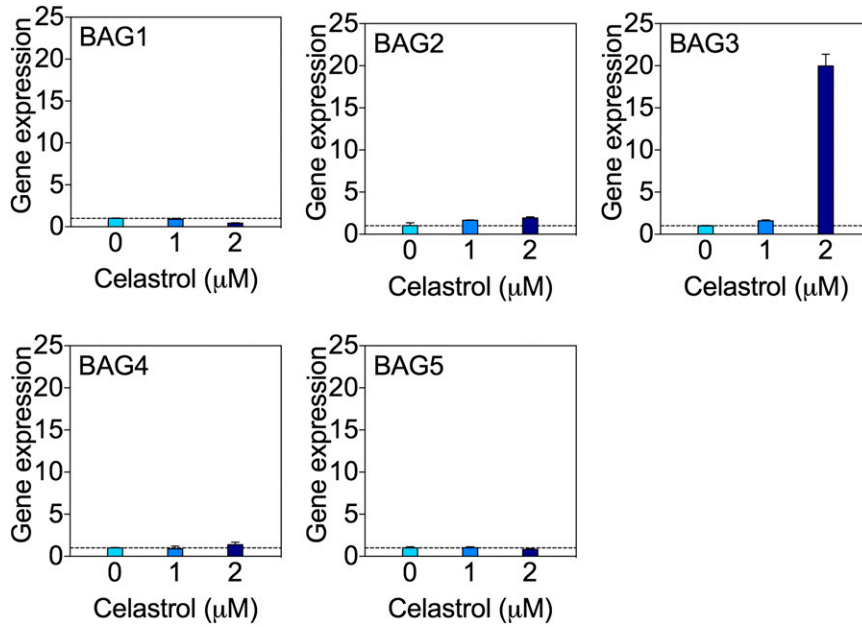

Fig. S1. Quantitative real-time PCR demonstrated that celastrol specifically induced *Bcl2-associated athanogene 3* (*BAG3*) expression.

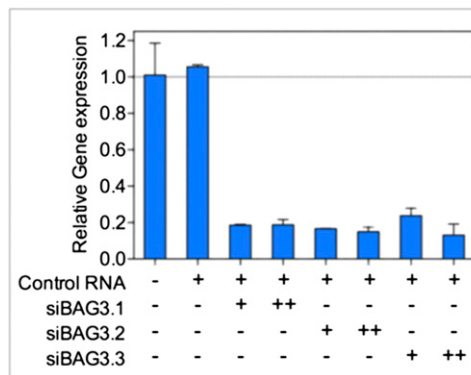

Fig. S2. Quantitative real-time PCR demonstrated dicer-substrate siRNAs effectively inhibited *BAG3* expression.

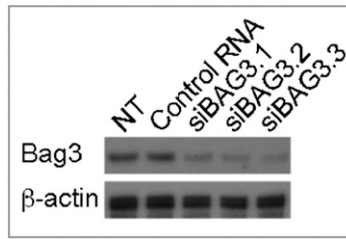

Fig. S3. BAG3 siRNA suppressed protein expression. Western blot demonstrated decreased BAG3 expression in the presence of siRNA oligomers (siBAG3.1–3) but not in the presence of control RNA or in nontransfected (NT) cells.

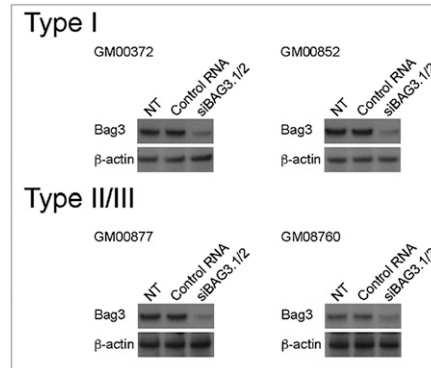

Fig. S4. BAG3 siRNA decreased BAG3 expression in Gaucher disease (GD) fibroblasts. Western blots demonstrated decreased BAG3 expression in type I and type II/III GD fibroblasts cotransfected with two sets of BAG3 siRNA (BAG3.1/2) but not after transfection with control RNA or in NT cells.

Table S1. Primer sets used for quantitative real-time PCR

| Gene   | Sense                               | Antisense                           |
|--------|-------------------------------------|-------------------------------------|
| BAG1   | 5'-CCTCAGTCTTCAGATACATGAGGG-3'      | 5'-ATATTCCTGACTAGGTGCAACCTC-3'      |
| BAG2   | 5'-AGCCACATTAGGCGCTCGGTCT-3'        | 5'-AGTTAGAGGTTTCGCGAGCCACACG-3'     |
| BAG3   | 5'-TAGGGAAGGCCACCCTGTGTAC-3'        | 5'-ACATGGAAAGGGTGCACCTGC-3'         |
| BAG4   | 5'-TTCAGGGCAGCGGATCCCATGT-3'        | 5'-AGGTGGGTGTACCGGCACATCT-3'        |
| BAG5   | 5'-ACCGTCATTTTGAATTGTTTCACATGGG-3'  | 5'-CCGGTACAAGGAACGAGAACAGATT-3'     |
| DNAJB1 | 5'-ATGCTCTGTTCCCTGGAGGCCAGTC-3'     | 5'-TGCTGTCGCACTTCATTGACTAGTCACAC-3' |
| DNAJB9 | 5'-TTCATGGATCTAGCAAGCACT-3'         | 5'-TAAGAACTACTGTCCTGAACAGTC-3'      |
| GAPDH  | 5'-CTCTGCTCCTCCTGTTTCGACAG-3'       | 5'-CGTTGACTCCGACCTTCACCT-3'         |
| HSPA1A | 5'-TGACCAACGCGGTGATCACCGT-3'        | 5'-TTGATGATCCGAGCAGCAGTTGAGCC-3'    |
| HSPA1B | 5'-CACTGGCCTTTCAGGTGATCAACG-3'      | 5'-ATCTTGGTCAGCACCATGGACGAGA-3'     |
| HSPA1L | 5'-AATCTGGACGTTTCCAAACTGAAGCGAAG-3' | 5'-CCAGGTCGATGCCTATGGCGATTTC-3'     |
| HSPA4L | 5'-GGTCCCTCTCGTTTCTTCTGGTAGGAG-3'   | 5'-TGGTACTGAACCTTCGGTACGGGAACC-3'   |
| HSPH1  | 5'-GGCATCGAGACCATCGCCAATG-3'        | 5'-CTGATTTTTGGCTGCAACTCCGATTGT-3'   |

BAG1–5, *Bcl2-associated athanogene 1–5*; DNAJB1/9, *DnaJ homolog subfamily B members 1 and 9*; GAPDH, *glyceraldehyde-3-phosphate dehydrogenase*; HSPA1A, *heat shock 70kDa proteins 1A*; HSPA1B, *heat shock 70kDa proteins 1B*; HSPA4L, *heat shock 70kDa protein 4L*; HSPH1, *heat shock 105kDa/110kDa protein 1*.
